# Supplementary material for: A large, X-shaped polyoxometalate [As6Fe7Mo22O98]25− assembled from [AsMo7O27]9− and [FeMo4O19]11− moieties
Source: Royal Society of Chemistry journal article supplement (doi:10.1039/c8dt02647e), 2018-01-01
Supplement: c8dt02647e1.pdf [file c8dt02647e1.pdf]

# **A large, X-shaped polyoxometalate [As<sub>6</sub>Fe<sub>7</sub>Mo<sub>22</sub>O<sub>98</sub>]<sup>25-</sup> assembled from [AsMo<sub>7</sub>O<sub>27</sub>]<sup>9-</sup> and [FeMo<sub>4</sub>O<sub>19</sub>]<sup>11-</sup> moieties**

Panfeng Wu, Yanping Zhang, Caiting Feng, Bin Liu, Huaiming Hu and Ganglin Xue\*

*Key Laboratory of Synthetic and Natural Functional Molecule Chemistry (Ministry of Education), Department of Chemistry, Northwest University, Xi'an, 710069, China*

*E-mail: xglin707@163.com*

Magnetic measurements: Magnetic susceptibility measurements were performed on previously ground, hand-collected crystals (9.73 mg, restrained in eicosane to prevent torquing at high fields) with a Quantum Design MPMS-XL-7 magnetometer. The susceptibility data were corrected from the diamagnetic contributions as deduced by using Pascal's constant tables. Direct current (dc) data were collected in the range of 1.8-300 K with an applied field of 1000 G. Thermogravimetric analysis was performed on a NETZSCH STA 449C TGA instrument in flowing N<sub>2</sub> with a heating rate of 10 °C·min<sup>-1</sup>. IR spectra were recorded in the range of 400-4000 cm<sup>-1</sup> on an EQUINOX55 FT/IR spectrophotometer using KBr pellets. The powder X-ray diffraction (PXRD) data were collected on a Bruker D8 diffractometer with Cu Kα radiation.

**Fig. S1** ball-and-stick representation for [As<sub>6</sub>Fe<sub>7</sub>Mo<sub>22</sub>O<sub>98</sub>]<sup>25-</sup>

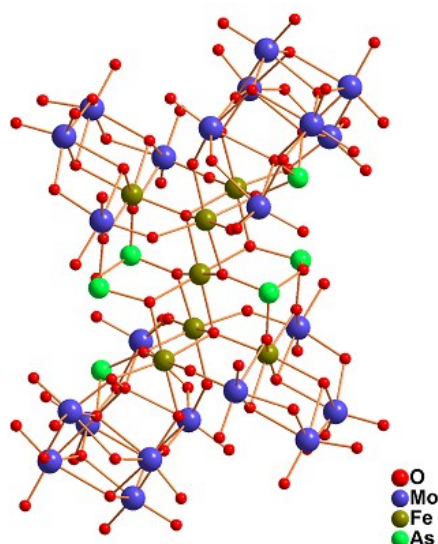

Fig. S2 IR spectra for  $(\text{NH}_4)_{25}[\text{As}_6\text{Fe}_7\text{Mo}_{22}\text{O}_{98}] \cdot 13\text{H}_2\text{O}$

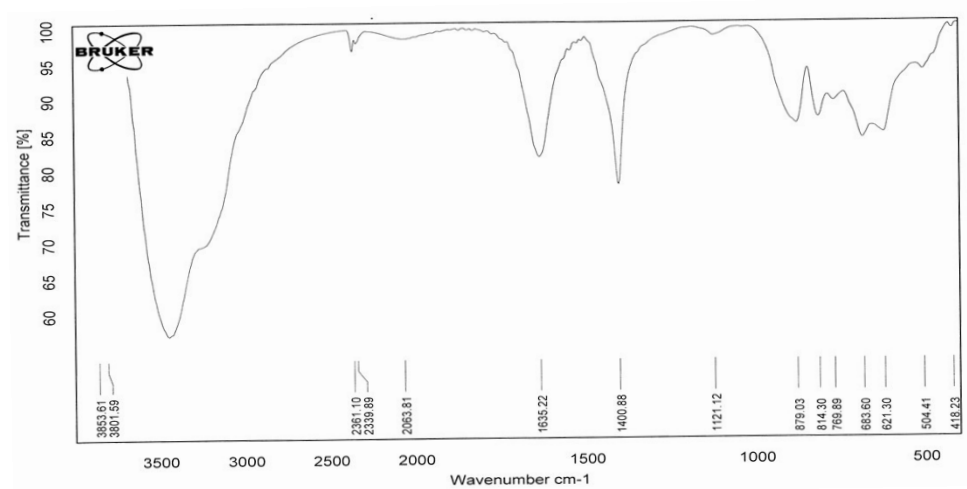

Fig. S3 Comparison of the simulated and experimental XRD patterns of  $(\text{NH}_4)_{25}[\text{As}_6\text{Fe}_7\text{Mo}_{22}\text{O}_{98}] \cdot 13\text{H}_2\text{O}$

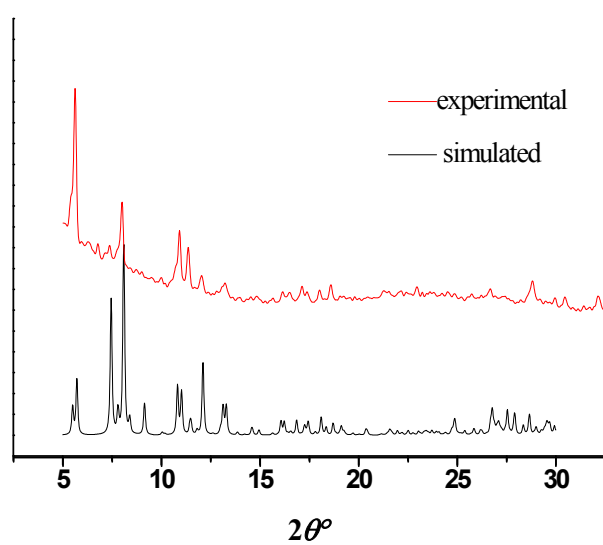

Fig. S4 TG curve of  $(\text{NH}_4)_{25}[\text{As}_6\text{Fe}_7\text{Mo}_{22}\text{O}_{98}]\cdot 13\text{H}_2\text{O}$

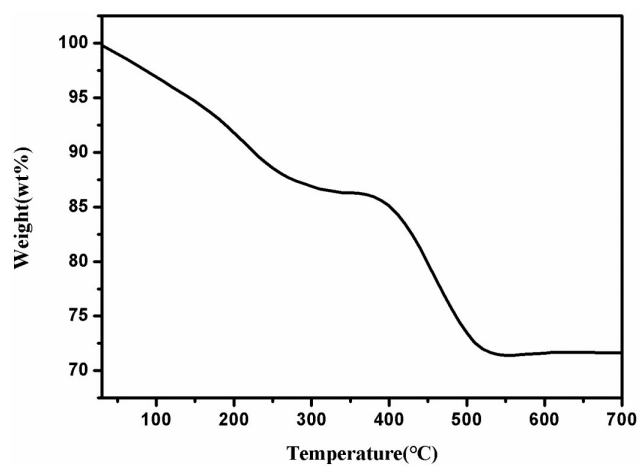

Table S1. Bond valence sum values for As, Fe and W atoms in **1**.

| atoms | BVS value | atoms | BVS value |
|-------|-----------|-------|-----------|
| Fe1   | 2.93      | Mo6   | 6.00      |
| Fe2   | 2.94      | Mo7   | 6.11      |
| Fe3   | 2.78      | Mo8   | 6.00      |
| Fe4   | 2.92      | Mo9   | 6.17      |
| Mo1   | 5.99      | Mo10  | 5.96      |
| Mo2   | 5.96      | Mo11  | 6.03      |
| Mo3   | 6.05      | As1   | 2.94      |
| Mo4   | 5.90      | As2   | 3.03      |
| Mo5   | 6.05      | As3   | 3.10      |
